# Supplementary material
Source: PubMed Central journal article supplement (PMC5532731)
Supplement: NIHMS872029-supplement.pdf [file NIHMS872029-supplement.pdf]

## **Supplemental Information**

### **Repression of interstitial identity in nephron progenitor cells by *Pax2* establishes the nephron-interstitium boundary throughout kidney development**

Natalie Naiman, Kaoru Fujioka, Mari Fujino, M. Todd Valerius, S. Steven Potter, Andrew P. McMahon and Akio Kobayashi

# Inventory of Supplemental Information

## Supplemental Figures

Figure S1. Generation of a Cre-dependent *Pax2*-null allele in the mouse, Related to Figure 1.

Figure S2. Focal expansion of the renal capsule and connective tissue around rare ureteric tips in cap mesenchyme-specific *Pax2* mutant kidneys, Related to Figure 2.

Figure S3. Molecular marker analysis of cap mesenchyme-specific *Pax2* mutant kidneys, Related Figures 4 and 5.

Figure S4. Some renal interstitial cells showed weak GFP expression in cap mesenchyme-specific *Pax2* mutant kidneys, Related Figures 4 and 5.

Figure S5. *Pax2* function in cap mesenchyme cells is required cell-autonomously to repress transdifferentiation into renal interstitial cells at 14.5 dpc, Related Figures 6.

Figure S6. Expression patterns of genes regulated in *Pax2*-mutant cap mesenchyme-derived cells, Related to Figure 7.

Figure S7. A model for cell type specification in the metanephric mesenchyme during kidney development, Related to Figures 4-7.

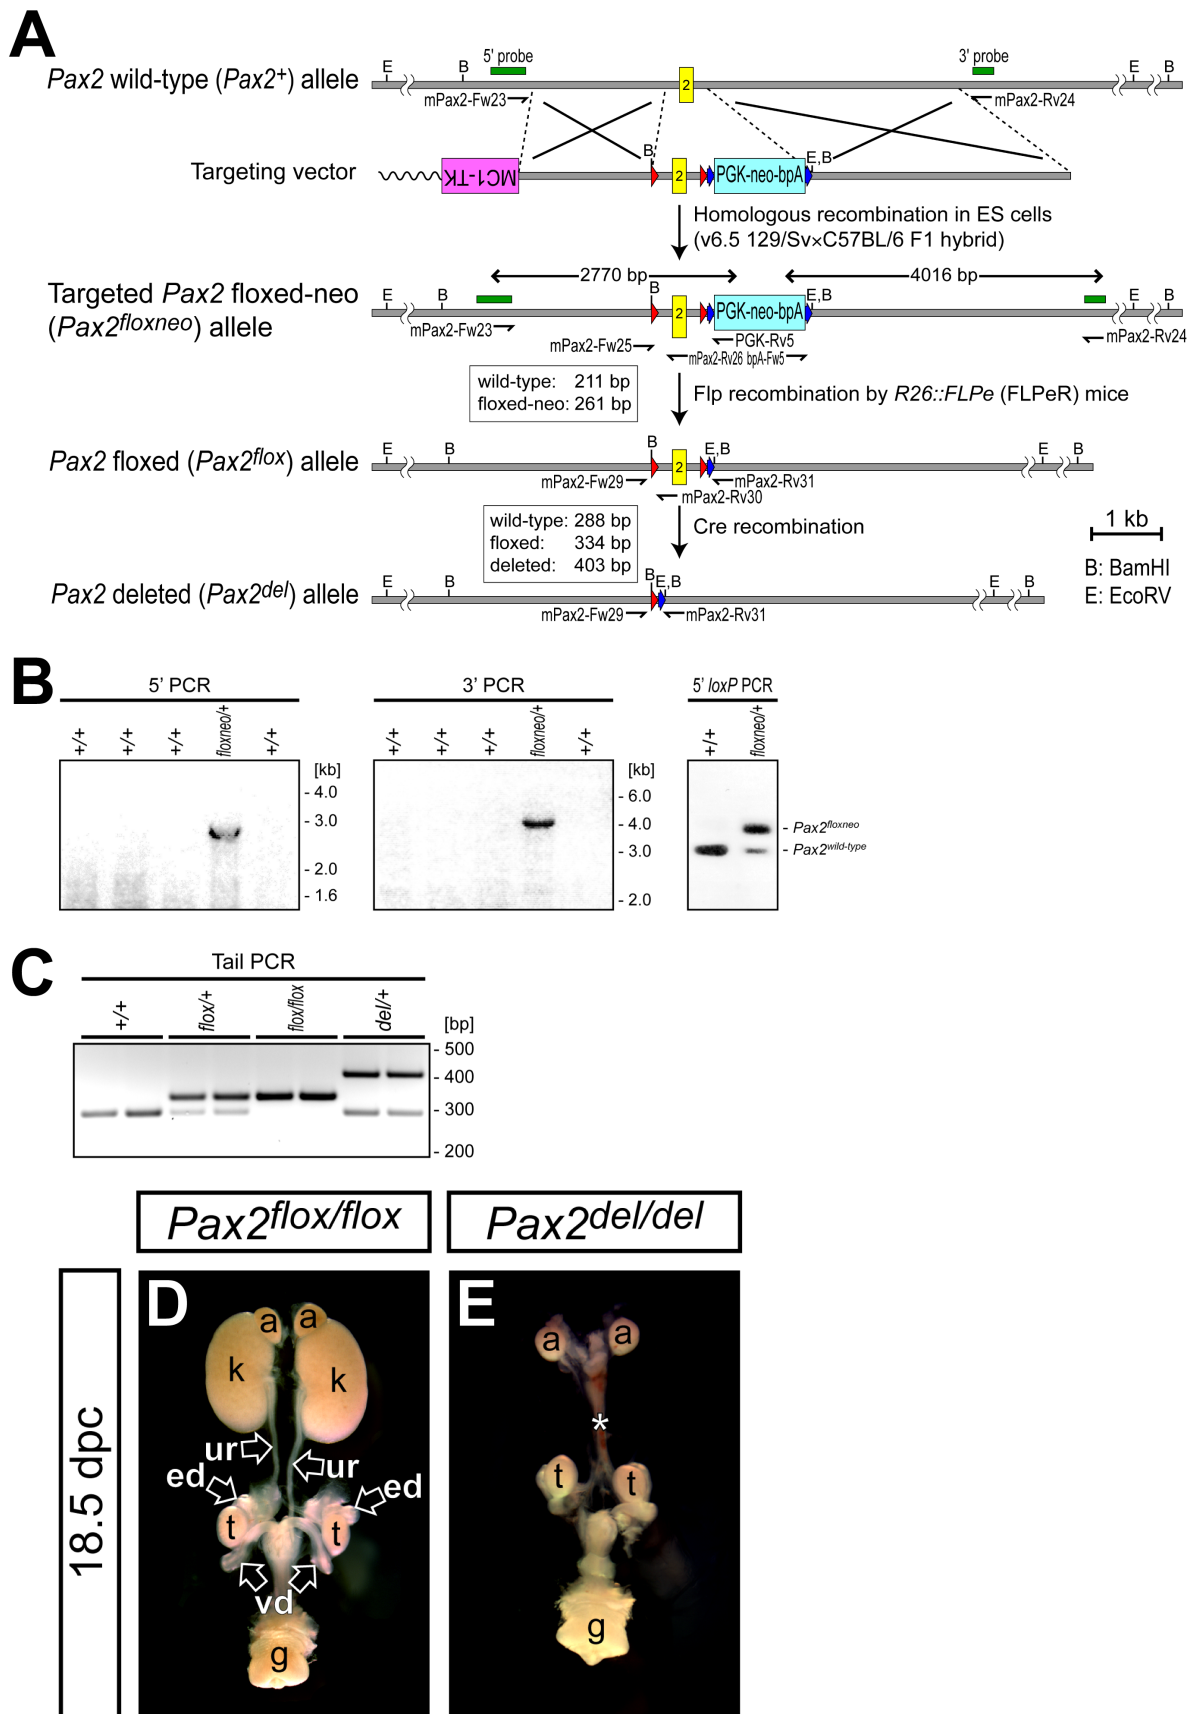

Figure S1. Generation of a Cre-dependent *Pax2*-null allele in the mouse, Related to Figure 1.

(A) Schematic illustration for generation of a conditional *Pax2*-null allele. Using homologous recombination in ES cells, two *loxP* sites (red triangles) flanking the exon 2 (yellow box) of the *Pax2* gene were introduced. PGK-neo and MC1-TK were used for positive and negative selection, respectively. After generating mice by blastocyst injection, the FRT (blue triangles)-flanked PGK-neo cassette was removed by breeding with *R26-FLPe* (FLPeR) mice (Farley et al., 2000). Deletion of the exon 2 by Cre recombination causes a frame-shift mutation with a premature translational termination. (B) Screening of a correctly targeted ES cell line by 5' PCR (mPax2-Fw23 and PGK-Rv5) and 3' PCR (bpA-Fw5 and mPax2-Rv24), which give 2,770 and 4,016-bp bands for the *Pax2*<sup>floxneo</sup> allele, respectively. Because the 5' *loxP* is not linked with the neo selection cassette, PCR screening for the 5' *loxP* site was performed by PCR (mPax2-Fw25 and mPax2-Rv26), which give 211 and 261-bp bands for *Pax2*<sup>+</sup> and *Pax2*<sup>floxneo</sup> alleles, respectively. (C) PCR genotyping (mPax2-Fw29, mPax2-Rv30 and mPax2-Rv31) using genomic DNA from the tail of wild-type, *Pax2*<sup>flox/+</sup>, *Pax2*<sup>flox/flox</sup>, and *Pax2*<sup>del/+</sup> mice. The *Pax2*<sup>+</sup>, *Pax2*<sup>flox</sup> and *Pax2*<sup>del</sup> alleles give 288, 334, 403-bp bands, respectively. (D and E) Validation of the conditional *Pax2* null allele. Intercrossing heterozygous *Pax2*<sup>flox/+</sup> and *Pax2*<sup>del/+</sup> mice generated homozygous *Pax2*<sup>flox/flox</sup> and *Pax2*<sup>del/del</sup> individuals, respectively. Whole-mount view of urogenital systems at 18.5 dpc from *Pax2*<sup>flox/flox</sup> (D) and *Pax2*<sup>del/del</sup> (E) males. While *Pax2*<sup>flox/flox</sup> mice were phenotypically normal (D), *Pax2*<sup>del/del</sup> mice showed phenotypes identical to those in the *Pax2*-null (*Pax2*<sup>-/-</sup>) mutants previously generated (Torres et al., 1995), including agenesis of the kidney, ureter and reproductive tract such as the epididymis and vas deferens in males (E). The asterisk in E indicates the dorsal aorta, which was removed in D. a, adrenal gland; ed, epididymis; g, genitalia; k, kidney; t, testis; ur, ureter; vd, vas deferens.

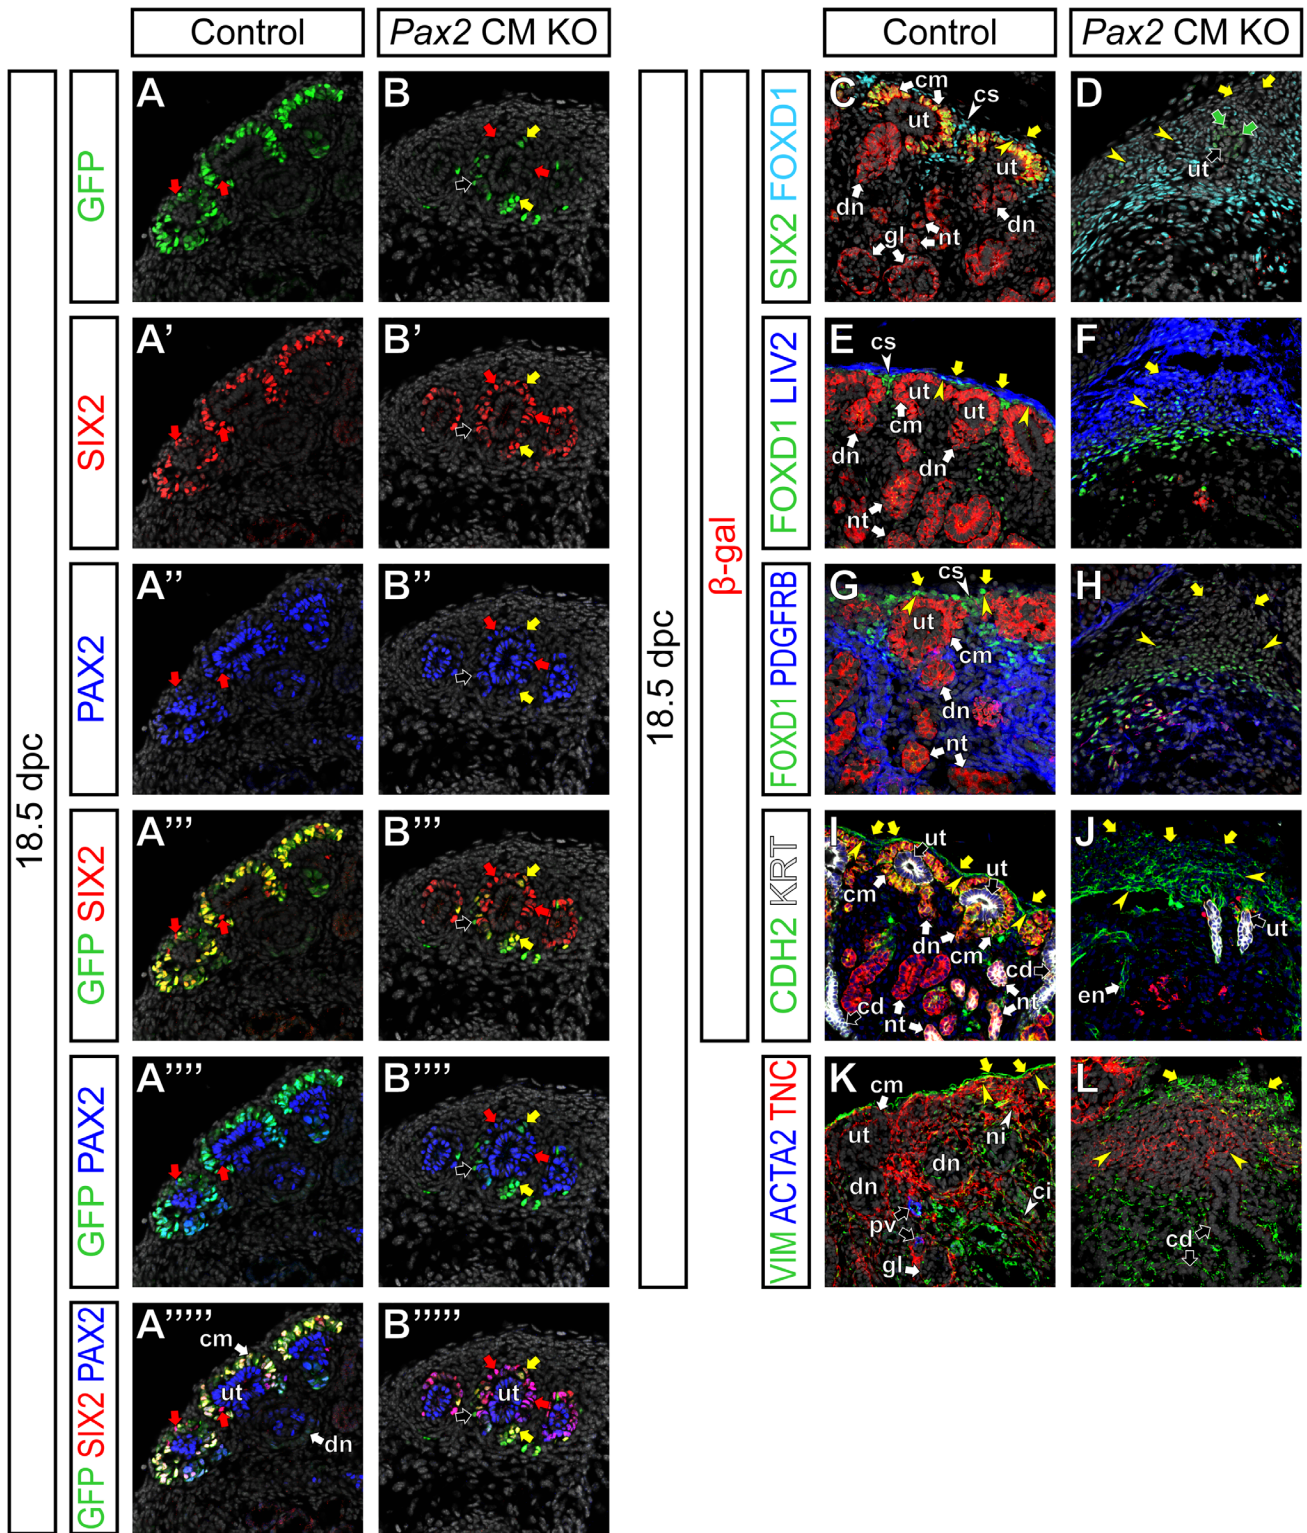

**Figure S2. Focal expansion of the renal capsule and connective tissue around rare ureteric tips in cap mesenchyme-specific *Pax2* mutant kidneys, Related to Figure 2.**

Confocal immunofluorescence of the cortical region of kidneys from *Six2*-eGFP<sup>Cre</sup><sup>tg/+</sup>; *Pax2*<sup>lox/+</sup>; *R26R*<sup>lacZ/+</sup> control mice (Control) and *Six2*-eGFP<sup>Cre</sup><sup>tg/+</sup>; *Pax2*<sup>lox/del</sup>; *R26R*<sup>lacZ/+</sup> cap mesenchyme-specific *Pax2* mutant mice (*Pax2* CM KO) at 18.5 dpc with Hoechst (nucleus; gray in A-H,K,L and blue in I,J) staining. **(A-B''''')** *Six2*-GFP (green), SIX2 (red) and PAX2 (blue) staining. Around rare ureteric tips in A-B''''', red arrows indicate *Six2*-GFP<sup>-</sup> SIX2<sup>+</sup> PAX2<sup>+</sup> cells, yellow arrows indicate *Six2*-GFP<sup>+</sup>

SIX2<sup>+</sup> PAX2<sup>low</sup> cells and black arrows indicate *Six2*-GFP<sup>+</sup> SIX2<sup>low or -</sup> PAX2<sup>-</sup> cells around rare ureteric tips. *Six2*-GFP<sup>+</sup> SIX2<sup>+</sup> PAX2<sup>low</sup> cells suggest recent inactivation of *Pax2* and most likely lose the cap mesenchyme status, becoming *Six2*-GFP<sup>+</sup> SIX2<sup>low or -</sup> PAX2<sup>-</sup> cells. **(C and D)** β-gal (cap mesenchyme-derived cells; red), SIX2 (green) and FOXD1 (cyan) staining. Green arrows in D indicate rare SIX2<sup>+</sup> β-gal<sup>-</sup> cells **(E and F)** β-gal (red), FOXD1 (green) and LIV2 (blue) staining. **(G and H)** β-gal (red), FOXD1 (green) and PDGFRB (blue) staining. **(I and J)** β-gal (red), CDH2 (green) and cytokeratin (KRT, ureteric tip and collecting duct; blue) staining. **(K and L)** Staining with renal interstitial markers; vimentin (VIM; green), α-smooth muscle actin (ACTA2; blue) and tenascin C (TNC; red). Yellow arrowheads in C-L, FOXD1<sup>+</sup> CDH2<sup>+</sup> VIM<sup>-</sup> TNC<sup>+</sup> SIX2<sup>-</sup> PDGFRB<sup>low</sup> LIV2<sup>+</sup> ACTA2<sup>-</sup> renal capsule; yellow arrows in C-L, FOXD1<sup>-</sup> CDH2<sup>low</sup> VIM<sup>+</sup> TNC<sup>-</sup> SIX2<sup>-</sup> PDGFRB<sup>low</sup> LIV2<sup>+</sup> ACTA2<sup>-</sup> connective tissue. cd, collecting duct; cm, cap mesenchyme; ci, renal cortical interstitium; cs, renal cortical stroma; dn, differentiating nephron; en, endothelium; gl, glomerulus; ni, nephrogenic interstitium; nt, nephron tubule; pv, peri-vasculature; ut, ureteric tip.

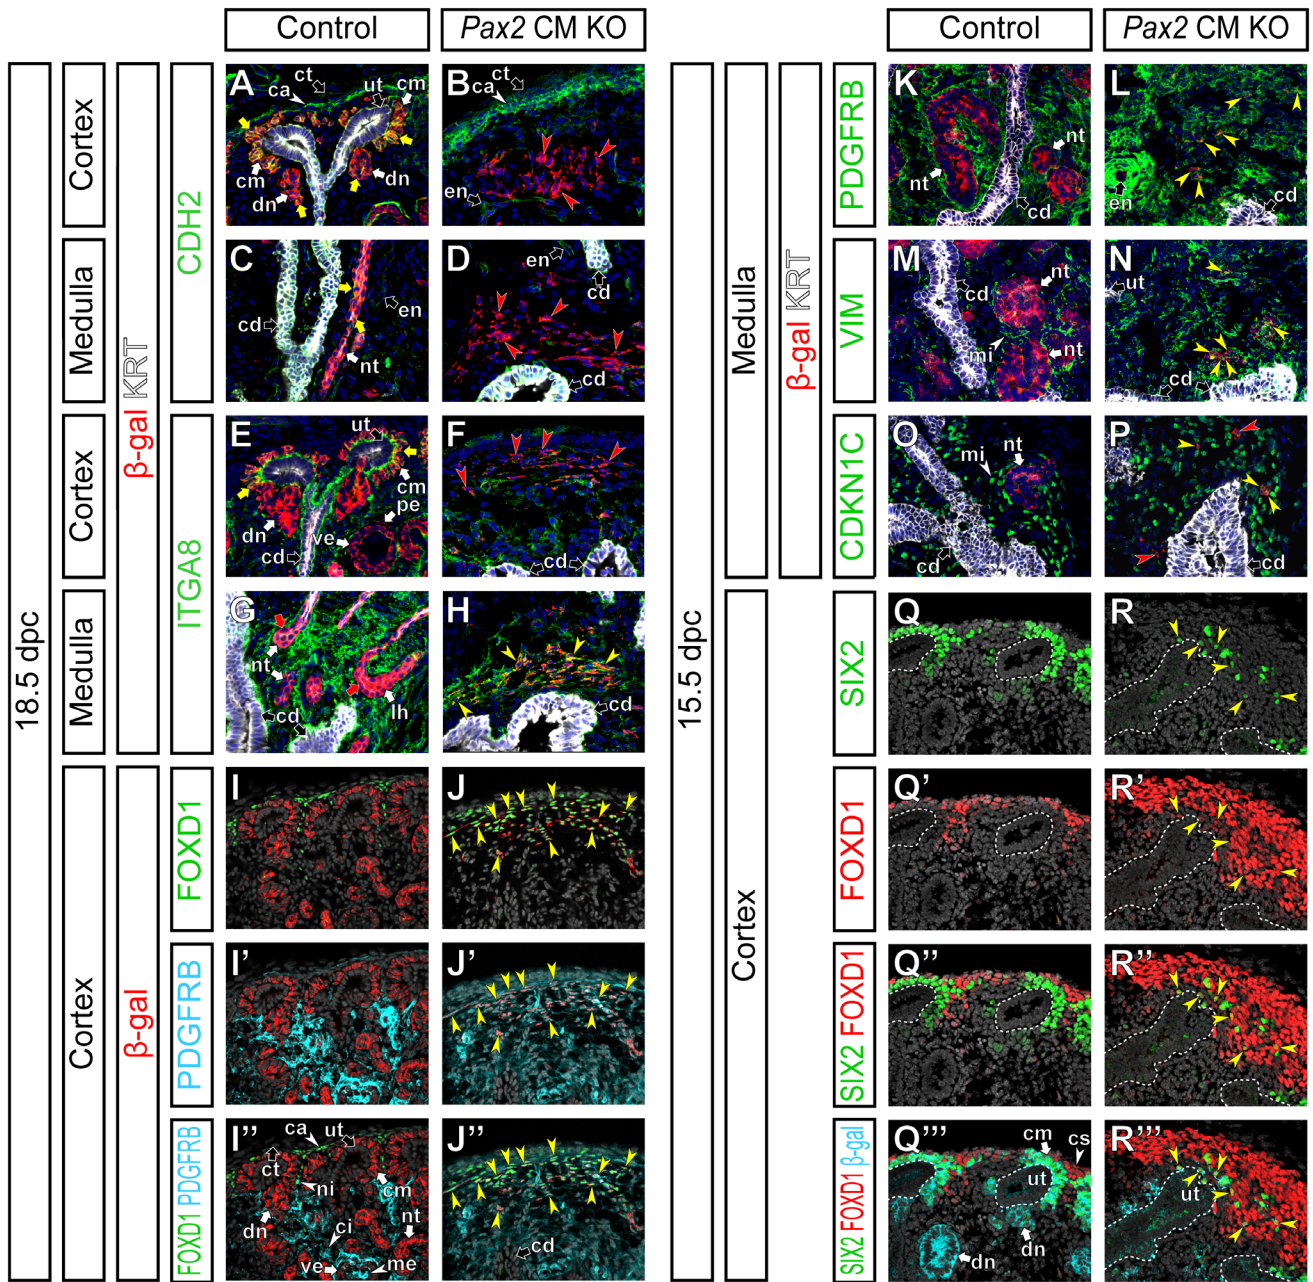

**Figure S3. Molecular marker analysis of cap mesenchyme-specific *Pax2* mutant kidneys, Related Figures 4 and 5.**

Confocal immunofluorescence of kidneys from Control and *Pax2* CM KO mice. **(A-H)** *Pax2*-deficient cap mesenchyme-derived cells lose gene expression for the nephron lineage, but ectopically gain that for the renal interstitium. The cortical (A,B,E,F) and medullary (C,D,F,H) regions at 18.5 dpc with β-gal (cap mesenchyme-derived cells; red), cytokeratin (KRT, ureteric tip and collecting duct; white) and Hoechst (nucleus; blue) staining. (A-D) CDH2 (N-cadherin; cap mesenchyme, epithelia, endothelium and renal capsule; green) staining. Yellow arrows in A,C, β-gal<sup>+</sup> CDH2<sup>+</sup> cells; red arrowheads in B,D, β-gal<sup>+</sup> CDH2<sup>-</sup> cells. (E-H) ITGA8 (integrin α8; cap mesenchyme, renal medullary interstitium and collecting duct; green) staining. Yellow arrows in E, β-gal<sup>+</sup> ITGA8<sup>+</sup> cap mesenchyme cells in controls; red arrowheads in F, β-gal<sup>+</sup> ITGA8<sup>or low</sup> renal interstitial cells in the cortical region of mutants; red arrows in G, β-gal<sup>+</sup> ITGA8<sup>-</sup> nephron tubule cells in controls; yellow arrowheads in H, β-gal<sup>+</sup> ITGA8<sup>+</sup> renal interstitial cells in the medullary region of mutants. **(I-J'')** FOXD1-expressing *Pax2*-deficient cap mesenchyme-derived cells co-express PDGFRB. The cortical region at 18.5 dpc with cytoplasmic β-gal (cap mesenchyme-derived cells; red), nuclear FOXD1 (green), membranous PDGFRB (cyan) and

Hoechst (nucleus; gray) staining. Yellow arrowheads,  $\beta$ -gal<sup>+</sup> FOXD1<sup>+</sup> PDGFRB<sup>+</sup> cells. **(K-P)** *Pax2*-deficient cap mesenchyme-derived cells ectopically express molecular markers for the renal medullary interstitium at 15.5 dpc. The medullary region with cytoplasmic  $\beta$ -gal (cap mesenchyme-derived cells; red), cytokeratin (KRT; collecting duct; white) and Hoechst (nucleus; blue) staining. (K and L) PDGFRB (green) staining in the membrane. Yellow arrowheads in L indicate  $\beta$ -gal<sup>+</sup> PDGFRB<sup>+</sup> cells. (M and N) VIM (Vimentin; green) staining in the cytoplasm. Yellow arrowheads in N indicate  $\beta$ -gal<sup>+</sup> VIM<sup>+</sup> cells. (O and P) CDKN1C (P57KIP2; green) staining in the nucleus. Yellow and red arrowheads in P indicate  $\beta$ -gal<sup>+</sup> CDKN1C<sup>+</sup> and  $\beta$ -gal<sup>+</sup> CDKN1C<sup>-</sup> cells, respectively. Note that CDKN1C is expressed in a subset of renal medullary interstitial cells in O and P. **(Q-R''')** *Pax2*-deficient cap mesenchyme-derived cells can express both SIX2 and FOXD1 at 15.5 dpc. The cortical region at 15.5 dpc with  $\beta$ -gal (cap mesenchyme-derived cells; red), SIX2 (green), FOXD1 (red) and Hoechst (nucleus; gray) staining. Yellow arrowheads indicate SIX2<sup>+</sup> FOXD1<sup>+</sup>  $\beta$ -gal<sup>+</sup> cells. White dashed lines indicate the ureteric tip/collecting duct. ca, renal capsule; cd, collecting duct; ci, renal cortical interstitium; cm, cap mesenchyme; cs, renal cortical stroma; ct, connective tissue; dn, differentiating nephron; en, endothelium; lh, loop of Henle; me, mesangium; mi, renal medullary interstitium; ni, nephrogenic interstitium; nt, nephron tubule; pe, parietal epithelium; sb, S-shaped body; ut, ureteric tip, ve, visceral epithelium (podocytes).

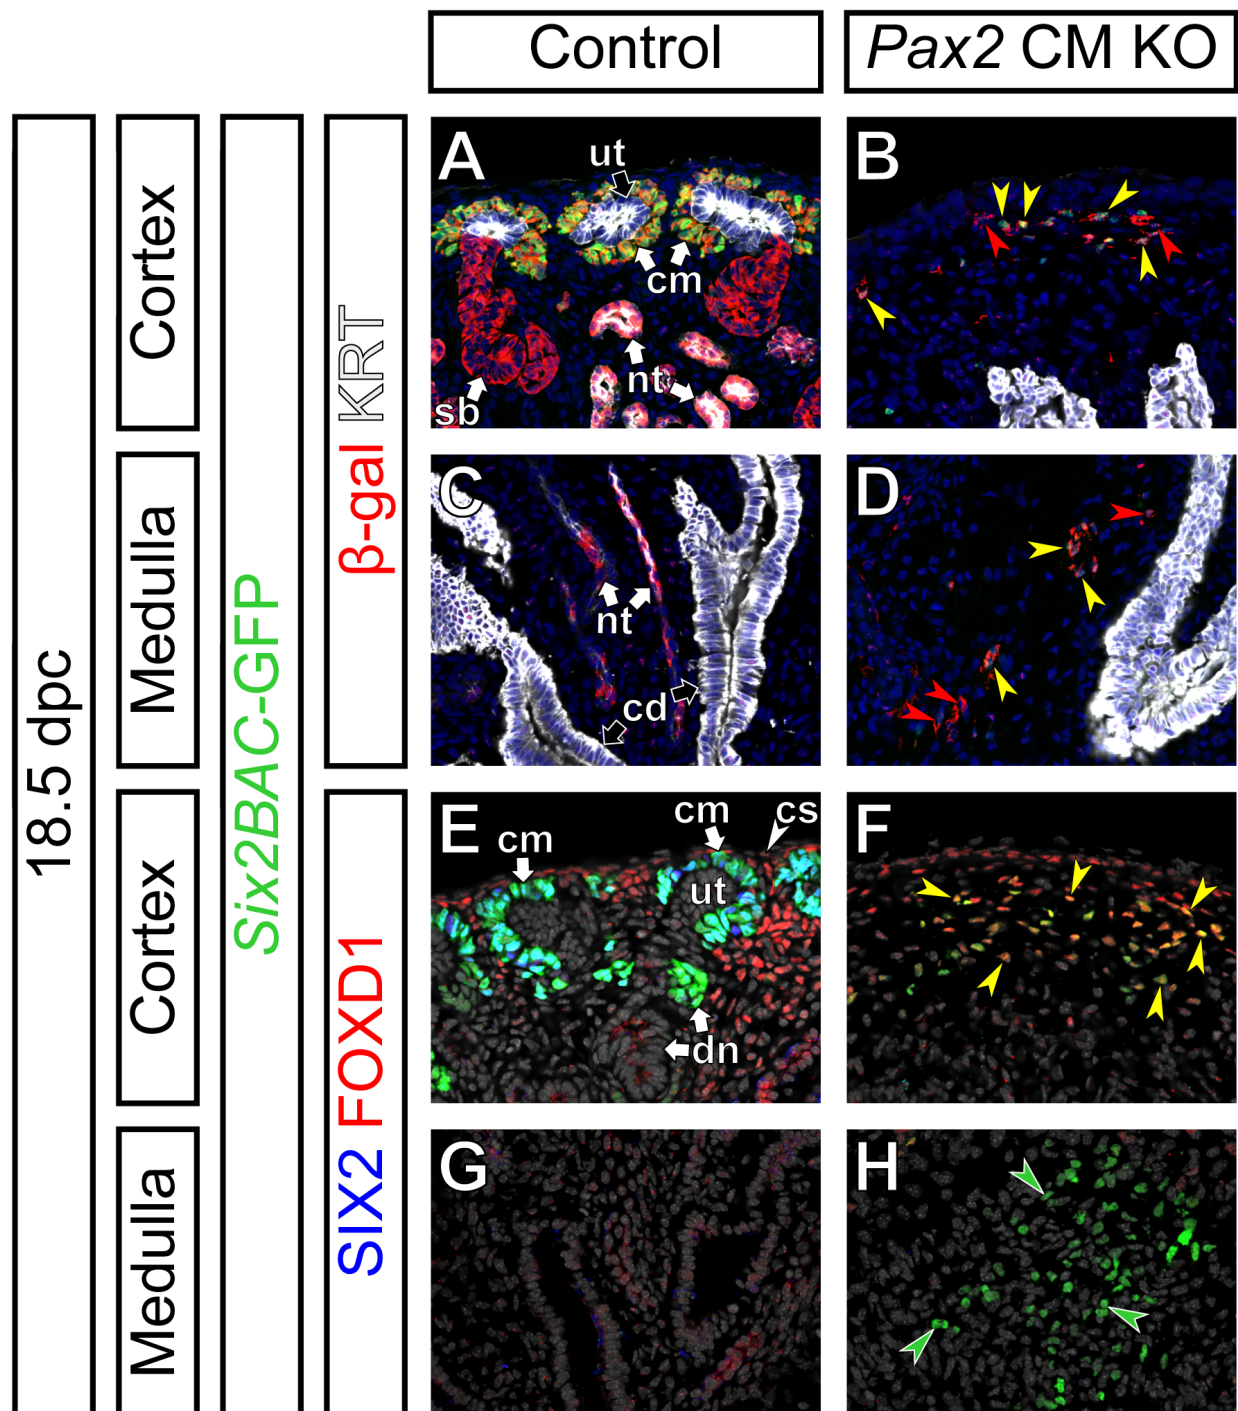

**Figure S4. Some renal interstitial cells showed weak GFP expression in cap mesenchyme-specific *Pax2* mutant kidneys, Related Figures 4 and 5.**

Confocal immunofluorescence of the cortical (A,B,E,F) and medullary (C,D,G,H) regions of kidneys from Control and *Pax2* CM KO mice at 18.5 dpc with GFP (green) and Hoechst (nucleus; blue in A-D and grey in E-H) staining. **(A-D)**  $\beta$ -gal (red) and cytokeratin (KRT; ureteric tip and collecting duct; white) staining. Yellow and red arrowheads in B and D indicate  $\beta$ -gal<sup>+</sup> GFP<sup>+</sup> and  $\beta$ -gal<sup>+</sup> GFP<sup>-</sup> cells in *Pax2* CM mutants, respectively. **(E-H)** SIX2 (blue) and FOXD1 (red) staining. Yellow arrowheads in F, GFP<sup>+</sup> FOXD1<sup>+</sup> SIX2<sup>-</sup> cells; green arrowheads in H, GFP<sup>+</sup> FOXD1<sup>-</sup> SIX2<sup>-</sup> cells. cd, collecting duct; cm, cap mesenchyme; cs, renal cortical stroma; dn, differentiating nephron; nt, nephron tubule; sb, S-shaped body; ut, ureteric tip.

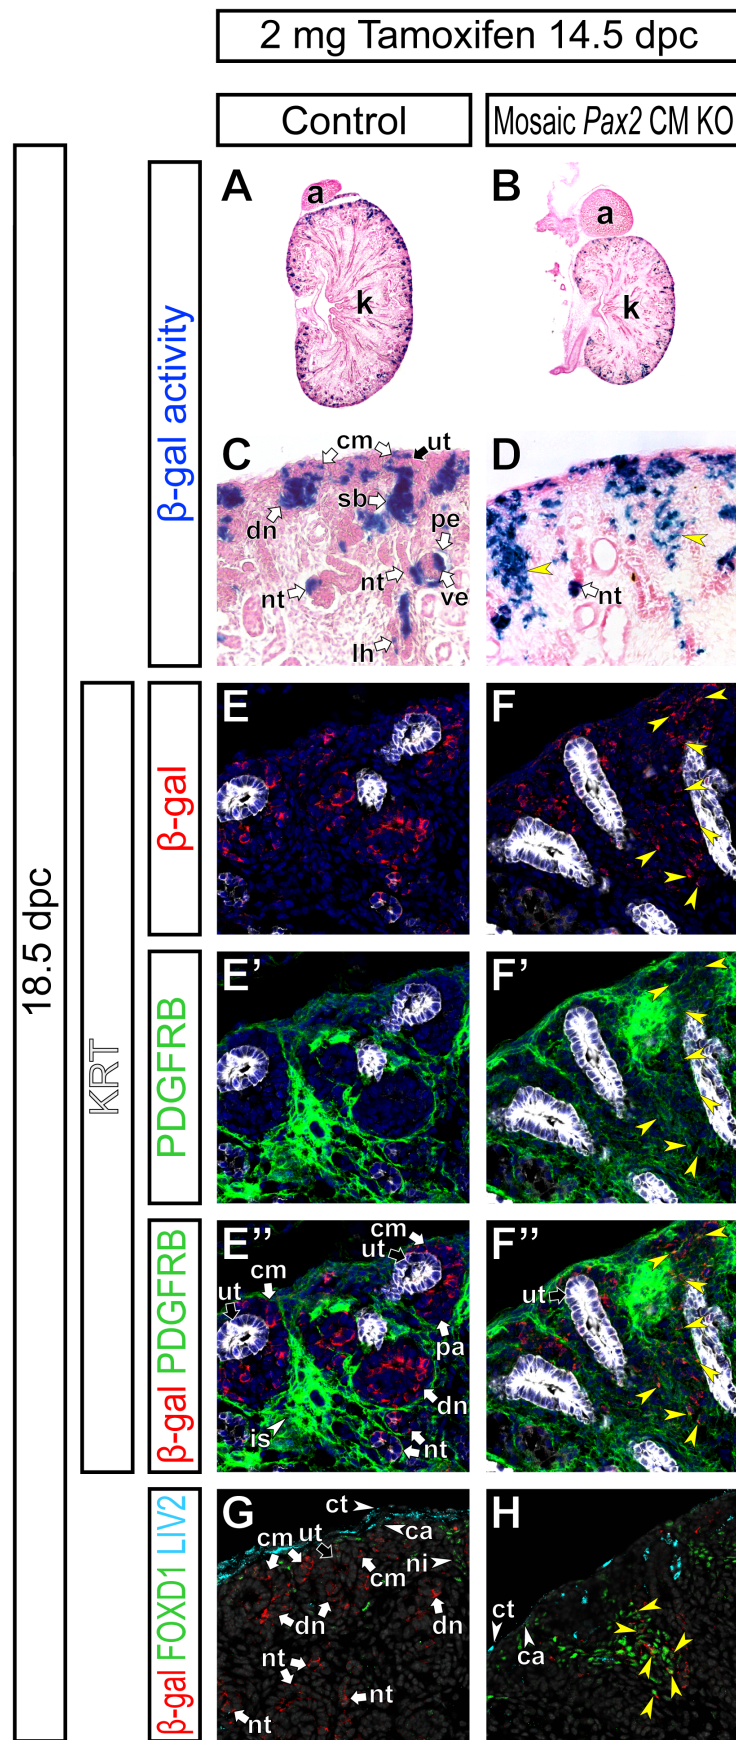

**Figure S5. *Pax2* function in cap mesenchyme cells is required cell-autonomously to repress transdifferentiation into renal interstitial cells at 14.5 dpc, Related Figures 6.**

Kidneys at 18.5 dpc from *Six2*<sup>eGFP<sup>CreERT2/+</sup></sup>; *Pax2*<sup>flox/+</sup>; *R26R*<sup>lacZ/+</sup> control mice (Control) and *Six2*<sup>eGFP<sup>CreERT2/+</sup></sup>; *Pax2*<sup>flox/del.</sup>; *R26R*<sup>lacZ/+</sup> mosaic cap mesenchyme-specific *Pax2* mutant mice (Mosaic *Pax2* CM KO) after injection of 2 mg of tamoxifen into dams at 14.5 dpc. **(A-D)** X-gal (blue) stained section counter-stained with eosin (pink). C and D show high magnification of cortical regions in A and B, respectively. Yellow arrowheads in D indicate X-gal stained cap mesenchyme-derived cells in the renal interstitium. **(E-F)** Confocal immunofluorescence of the cortical region with  $\beta$ -gal (cap mesenchyme-derived cells; red), PDGFRB (green), cytokeratin (KRT; ureteric tip and collecting duct; white) and Hoechst (nucleus; blue) staining. Yellow arrowheads indicate  $\beta$ -gal<sup>+</sup> PDGFRB<sup>+</sup> cells. **(G and H)** Confocal immunofluorescence of the cortical region with  $\beta$ -gal (cap mesenchyme-derived cells; red), FOXD1 (green), LIV2 (cyan) and Hoechst (nucleus; gray) staining. Yellow arrowheads in H indicate  $\beta$ -gal<sup>+</sup> FOXD1<sup>+</sup> cells. a, adrenal gland; ca, renal capsule; cm, cap mesenchyme; ct, connective tissue; dn, differentiating nephron; is, renal interstitium; k, kidney; ni, nephrogenic interstitium; nt, nephron tubule; pa, pretubular aggregate; ut, ureteric tip.

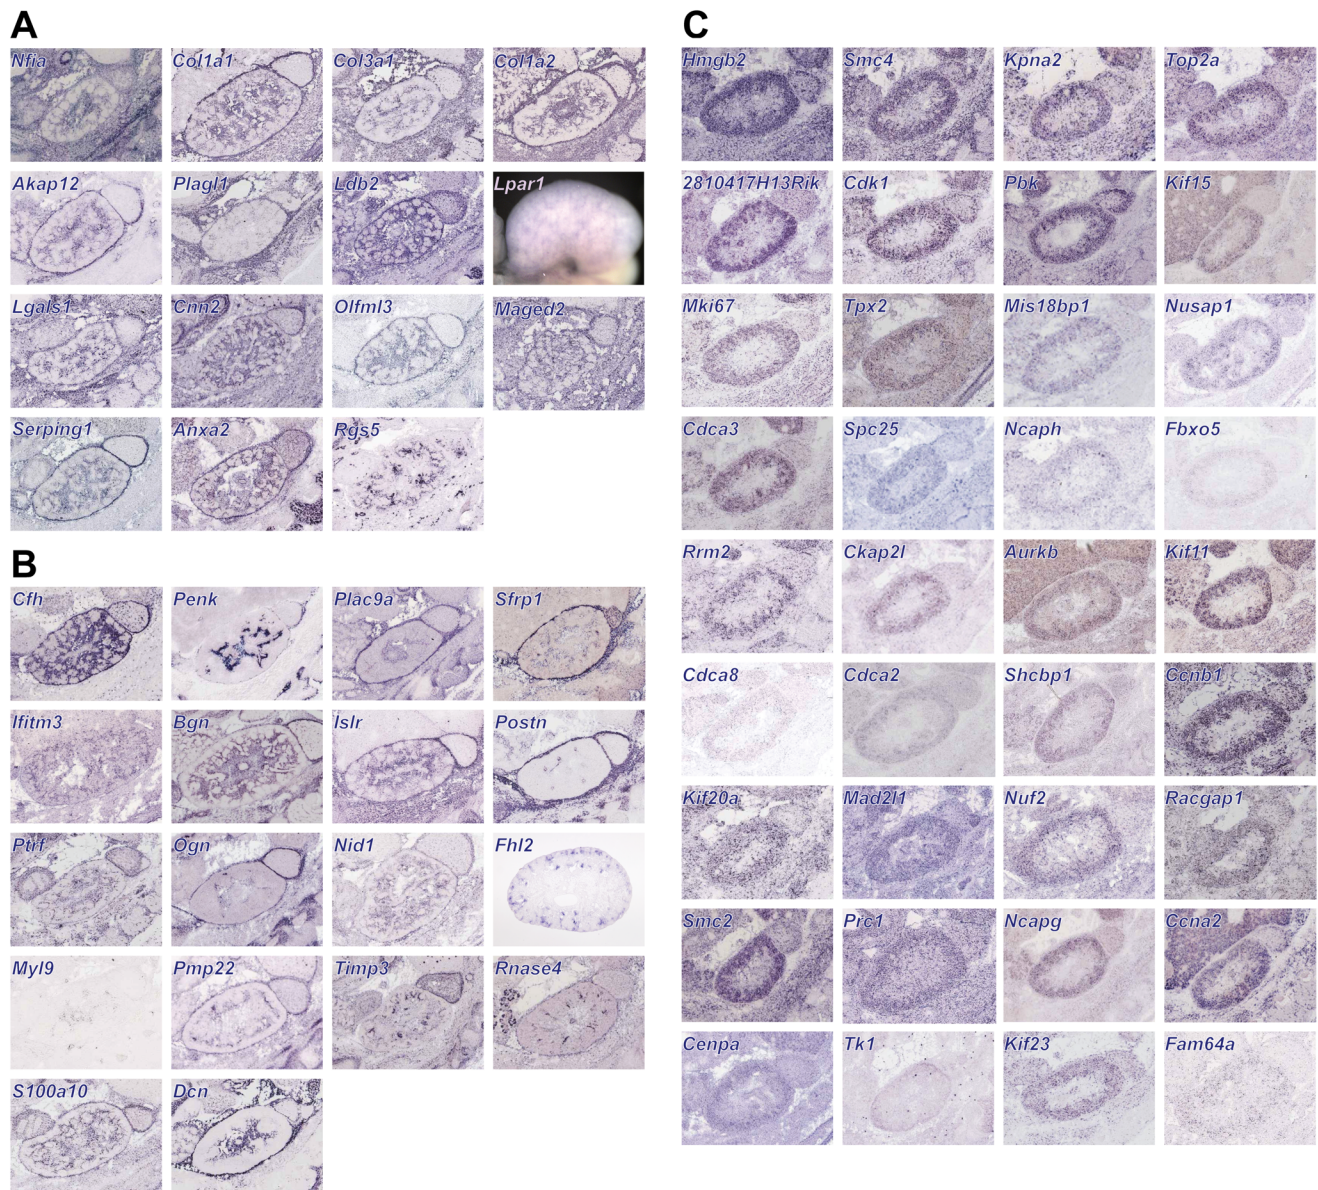

**Figure S6. Expression patterns of genes regulated in *Pax2*-mutant cap mesenchyme-derived cells, Related to Figure 7.**

Section in situ hybridization at 14.5 dpc from the GenePaint and Euroexpress databases for up- and down-regulated genes in *Pax2*-deficient cap mesenchyme-derived cells, except for *Lpar1* by whole-mount in situ hybridization at 15.5 dpc and *Fhl2* by section in situ at 15.5 dpc from the GUDMAP database. **(A and B)** Genes up-regulated at 13.5 dpc (A) and 18.5 dpc (B). Most genes up-regulated in *Pax2*-mutant cap mesenchyme-derived cells are renal interstitium-specific genes. **(C)** Down-regulated genes. Most genes down-regulated in *Pax2*-mutant cap mesenchyme-derived cells encode cell cycle-regulating genes highly expressed in the nephrogenic zone.

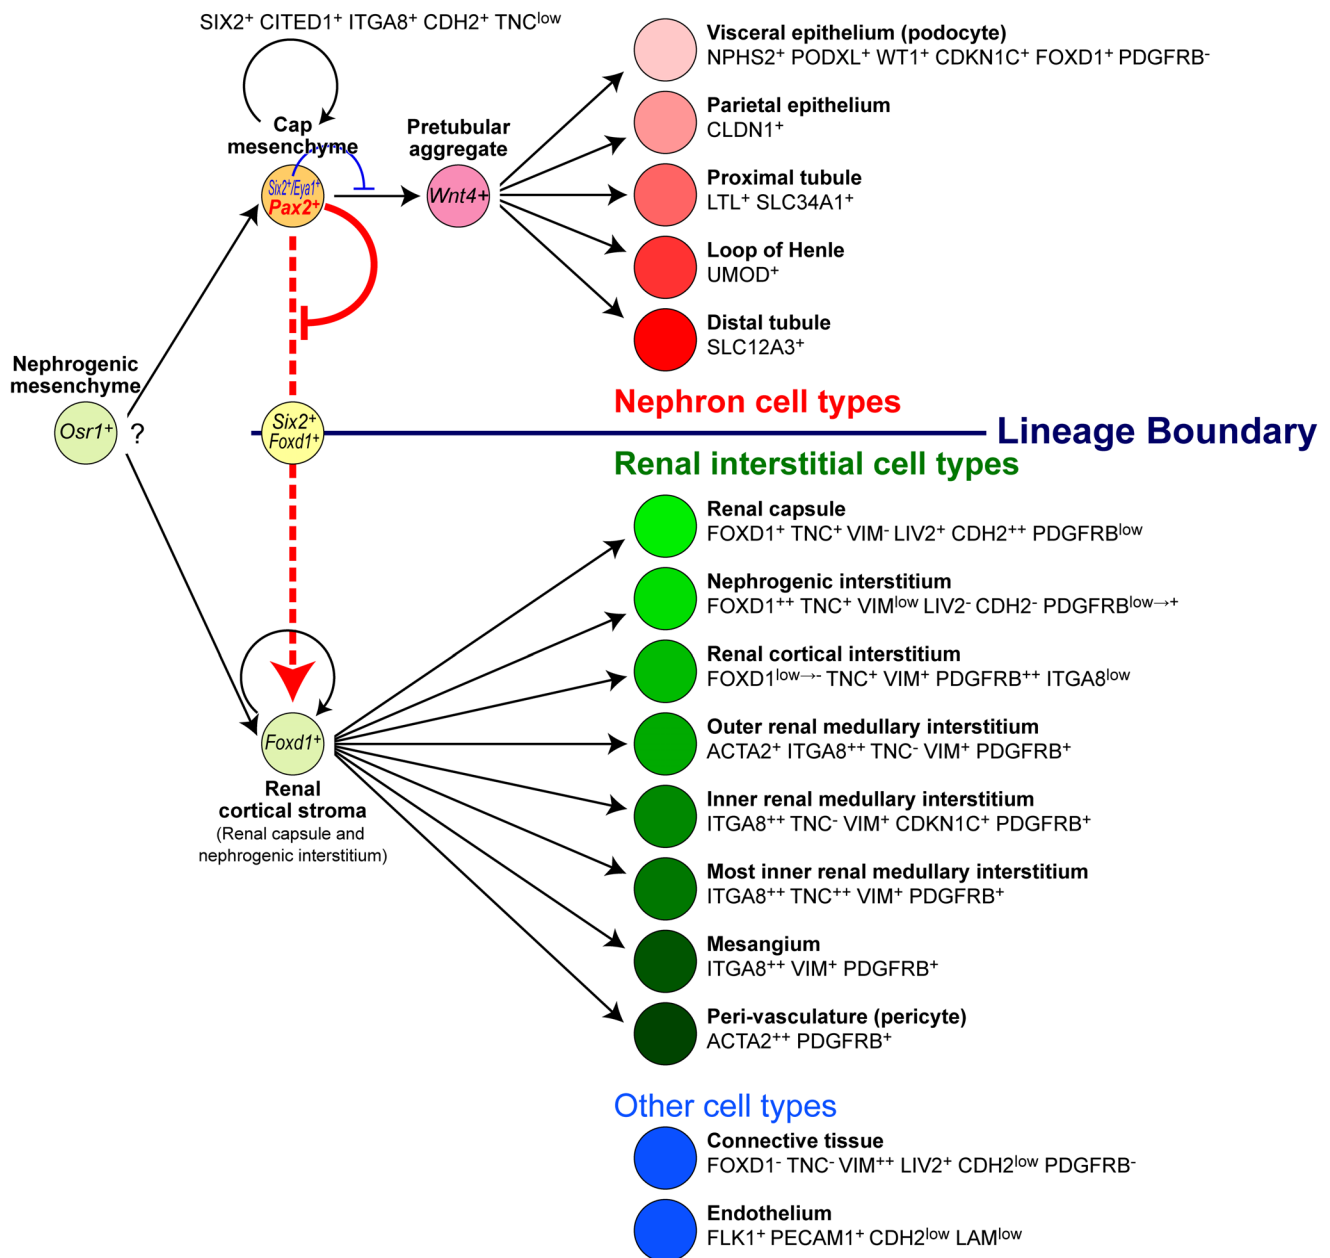

**Figure S7. A model for cell type specification in the metanephric mesenchyme during kidney development, Related Figures 4-7.**

We previously showed that the  $Six2^+$  cap mesenchyme and  $Foxd1^+$  renal cortical stroma are multipotent self-renewing progenitor populations for the nephron epithelia and renal interstitium, respectively (Kobayashi et al., 2014; Kobayashi et al., 2008). There is a lineage boundary between the nephron epithelia and renal interstitium compartments.  $Six2$  cell-autonomously maintains cap mesenchyme cells by repressing precocious differentiation into differentiating nephron epithelial cells (Kobayashi et al., 2008; Self et al., 2006) cooperating with  $Eya1$  (Xu et al., 2014). Our observation in this study showed that  $Pax2$ -deficient cap mesenchyme cells transiently become  $SIX2^+ FOXD1^+$  double positive cells and subsequently transdifferentiate into renal interstitial cell types. Thus, the lineage boundary between the nephron and renal interstitial compartments is established by the cell-autonomous  $Pax2$  function in nephron progenitor cells by repressing transdifferentiation into renal interstitial cell fates during kidney development.
